# Supplementary material for: Self-assembled hairy ball-like Co3O4 nanostructures for lithium ion batteries
Source: Royal Society of Chemistry journal article supplement (doi:10.1039/c3ta12310c), 2013-01-01
Supplement: c3ta12310c.pdf [file c3ta12310c.pdf]

Electronic supplementary information (ESI)

## Self-assembled hairy ball-like $\text{Co}_3\text{O}_4$ nanostructures for lithium ion batteries

Dong Fang<sup>a</sup>, Licheng Li<sup>a</sup>, Weilin Xu<sup>\*a</sup>, Guangzhong Li<sup>b</sup>, Gang Li<sup>b</sup>, Nanfang Wang<sup>c</sup>, Zhiping Luo<sup>\*d</sup>, Jie xu<sup>a</sup>, Li Liu<sup>a</sup>, ChenLi Huang<sup>a</sup>, Caowei Liang<sup>a</sup>, Yongsheng Ji<sup>a</sup>

<sup>a</sup> Key Lab of Green Processing and Functional Textiles of New Textile Materials, Ministry of Education, College of Material Science and Engineering, Wuhan Textile University, Wuhan, P. R. China, Fax: (86)02759367580; Tel: (86)02759367580

<sup>b</sup> State Key Laboratory of Porous Metal Material, Northwest Institute for Non-ferrous Metal Research, Xi'an, P. R. China

<sup>c</sup> School of Chemistry and Chemical Engineering, Hunan Institute of Engineering, Xiangtan, P. R. China

<sup>d</sup> Department of Chemistry and Physics and Southeastern North Carolina Regional Microanalytical and Imaging Consortium, Fayetteville State University, Fayetteville, USA. E-mail: [zluo@uncfsu.edu](mailto:zluo@uncfsu.edu); Tel: +1 910 672 2647

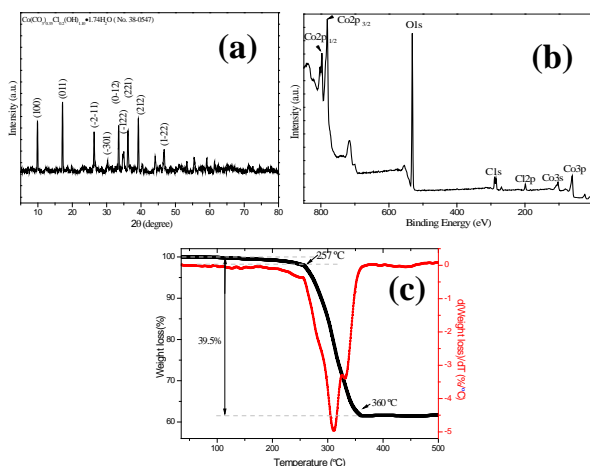

Fig. S1 (a) XRD pattern, (b) XPS spectrum and (c) TG/DTA profiles of the as-prepared hairy ball-like spheres.

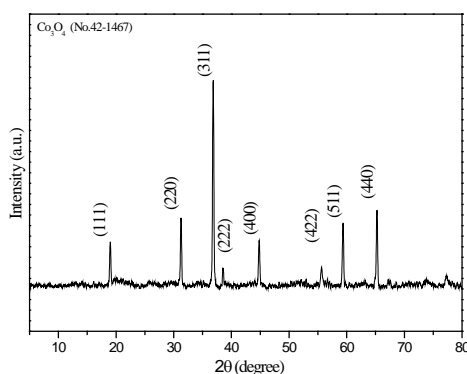

Fig. S2 XRD pattern of hairy ball-like  $\text{Co}_3\text{O}_4$  spheres after annealing at 400 °C.
